# Supplementary material for: Effect of a Nutrition Supplement and Physical Activity Program on Pneumonia and Walking Capacity in Chilean Older People: A Factorial Cluster Randomized Trial
Source: PLoS Med. 2011 Apr 19;8(4):e1001023. doi: 10.1371/journal.pmed.1001023 (PMC3079648; doi:10.1371/journal.pmed.1001023)
Supplement: Table S4 — Secondary analysis of pneumonia outcomes in CENEX study of adults aged 65–67 y in Santiago, Chile: per protocol analysis of adherent individuals (A); analysis of combined pneumonia and ALRI incidence in total study sample over 24 mo (B). (PDF) [file pmed.1001023.s005.pdf]

Table S4: *Secondary analysis of pneumonia outcomes in CENEX study of adults aged 65-67 years in Santiago, Chile: per protocol analysis of adherent individuals (top panel A ); analysis of combined pneumonia and acute lower respiratory infection (ALRI) incidence in total study sample over 24 months (bottom panel B)*

| Variable                                                      | Nutritional supplement<br>(+/- physical activity) | No nutritional supplement<br>(+/- physical activity) | Adjusted RR<br>(95% CI) | Statistic | p-value |
|---------------------------------------------------------------|---------------------------------------------------|------------------------------------------------------|-------------------------|-----------|---------|
| <b>A. Per protocol analysis for pneumonia primary outcome</b> |                                                   |                                                      |                         |           |         |
| Number of health centers                                      | 14                                                | 14                                                   |                         |           |         |
| Number of participants                                        | 1080                                              | 1381                                                 |                         |           |         |
| Participants with pneumonia                                   | 53                                                | 71                                                   |                         |           |         |
| Pneumonia total cases                                         | 68                                                | 83                                                   |                         |           |         |
| Pneumonia incidence (per 1000 PY)                             | 34.1                                              | 32.6                                                 | 1.05 (0.65-1.69)        | Z=0.18    | 0.85    |
| <b>B. Combined pneumonia and ALRI incidence rates</b>         |                                                   |                                                      |                         |           |         |
| Number of health centers                                      | 14                                                | 14                                                   |                         |           |         |
| Number of participants                                        | 1418                                              | 1381                                                 |                         |           |         |
| Participants with pneumonia or ALRI                           | 261                                               | 227                                                  |                         |           |         |
| Pneumonia or ALRI cases                                       | 388                                               | 352                                                  |                         |           |         |
| Pneumonia or ALRI incidence (per 1000 PY)                     | 148.9                                             | 139.0                                                | 1.08 (0.82-1.41)        | Z=0.54    | 0.59    |
